# Supplementary material
Source: publisher figshare collection journal article supplement (https://acs.figshare.com/ndownloader/files/4074235)
Supplement: Supplementary file 1 [file 4074235]

# 1. SUBMISSION DETAILS

_publ_requested_journal  'Organomettalics'

#=============================================================================
# 2. TITLE AND AUTHOR LIST
_publ_section_title
;
Gold phosphole complexes as efficient catalysts for enyne cycloisomerisation
;

loop_
_publ_author_name
_publ_author_address

'K�vin FOURMY'
;
 CNRS, Laboratoire  de  Chimie  de  Coordination,  205  route  de 
Narbonne, BP 44099, F-31077 Toulouse Cedex 4, France 
 Universit\'e de Toulouse, UPS, INPT, F-31077 Toulouse Cedex 4, France 
;
'Sonia LADEIRA'
;
 CNRS, Laboratoire  de  Chimie  de  Coordination,  205  route  de 
Narbonne, BP 44099, F-31077 Toulouse Cedex 4, France 
 Universit\'e de Toulouse, UPS, INPT, F-31077 Toulouse Cedex 4, France 
;
'Odile DECHY-CABARET'
;
 CNRS, Laboratoire  de  Chimie  de  Coordination,  205  route  de 
Narbonne, BP 44099, F-31077 Toulouse Cedex 4, France 
 Universit\'e de Toulouse, UPS, INPT, F-31077 Toulouse Cedex 4, France 
;
' Maryse GOUYGOU'
;
 CNRS, Laboratoire  de  Chimie  de  Coordination,  205  route  de 
Narbonne, BP 44099, F-31077 Toulouse Cedex 4, France 
 Universit\'e de Toulouse, UPS, INPT, F-31077 Toulouse Cedex 4, France 
;


data_[Au(TMP)Cl]
 
#----------------------------------------------------------------------------#
#                   CHEMICAL INFORMATION                                     #
#----------------------------------------------------------------------------#
 
_chemical_name_systematic
;
 ?
;
_chemical_formula_moiety                'C14 H17 Au Cl P'
_chemical_formula_sum                   'C14 H17 Au Cl P'
_chemical_formula_weight                448.67
_chemical_compound_source               'synthesis as described'
 
#----------------------------------------------------------------------------#
#                   UNIT CELL INFORMATION                                    #
#----------------------------------------------------------------------------#
 
_symmetry_cell_setting                  monoclinic
_symmetry_space_group_name_H-M          'P 21/n'
_symmetry_space_group_name_Hall         '-P 2yn'
_symmetry_Int_Tables_number             14
loop_
    _symmetry_equiv_pos_as_xyz
'x, y, z'
'-x+1/2, y+1/2, -z+1/2'
'-x, -y, -z'
'x-1/2, -y-1/2, z-1/2'
 
_cell_length_a                          8.6475(2)
_cell_length_b                          12.3083(3)
_cell_length_c                          13.4670(3)
_cell_angle_alpha                       90
_cell_angle_beta                        90.181(2)
_cell_angle_gamma                       90
_cell_volume                            1433.37(6)
_cell_formula_units_Z                   4
_cell_measurement_temperature           180(2)
_cell_measurement_reflns_used           11062
_cell_measurement_theta_min             3.2423
_cell_measurement_theta_max             31.3591
_cell_measurement_wavelength            0.71073
 
#----------------------------------------------------------------------------#
#                   CRYSTAL INFORMATION                                      #
#----------------------------------------------------------------------------#
 
_exptl_crystal_description              block
_exptl_crystal_colour                   colourless
_exptl_crystal_size_max                 0.4
_exptl_crystal_size_mid                 0.24
_exptl_crystal_size_min                 0.16
_exptl_crystal_density_diffrn           2.079
_exptl_crystal_density_method           'not measured'
_exptl_crystal_F_000                    848
_exptl_special_details
;
 ?
;
 
#----------------------------------------------------------------------------#
#                   ABSORPTION CORRECTION                                    #
#----------------------------------------------------------------------------#
 
_exptl_absorpt_coefficient_mu           10.537
_exptl_absorpt_correction_type          numerical
_exptl_absorpt_process_details
;
        [(a) W. R. Busing and H. A. Levy, Acta Crystallogr. 1957, 10, 180-182. 
(b) P. Coppens, L. Leiserowitz and D. Rabinovich, Acta Crystallogr. 
1965, 18, 1035-1038]
;
_exptl_absorpt_correction_T_min         0.060
_exptl_absorpt_correction_T_max         0.200
 
#----------------------------------------------------------------------------#
#                   DATA COLLECTION                                          #
#----------------------------------------------------------------------------#
 
_diffrn_ambient_temperature             180(2)
_diffrn_radiation_wavelength            0.71073
_diffrn_radiation_type                  MoK\a
_diffrn_radiation_source          'Enhance (Mo) X-ray Source' 
_diffrn_radiation_monochromator   graphite
_diffrn_measurement_device_type   'Oxford-Diffraction XCALIBUR'
_diffrn_measurement_method        \w-\f
_diffrn_standards_number          0
_diffrn_standards_interval_count  0
_diffrn_standards_interval_time   0
_diffrn_standards_decay_%         0
_diffrn_radiation_probe                 x-ray
_diffrn_reflns_av_R_equivalents         0.0391
_diffrn_reflns_av_unetI/netI            0.0278
_diffrn_reflns_number                   12101
_diffrn_reflns_limit_h_min              -12
_diffrn_reflns_limit_h_max              12
_diffrn_reflns_limit_k_min              -11
_diffrn_reflns_limit_k_max              17
_diffrn_reflns_limit_l_min              -19
_diffrn_reflns_limit_l_max              19
_diffrn_reflns_theta_min                3.25
_diffrn_reflns_theta_max                30.51
_diffrn_reflns_theta_full               30.51
_diffrn_measured_fraction_theta_full
                                        0.984
_diffrn_measured_fraction_theta_max
                                        0.984
_reflns_number_total                    4302
_reflns_number_gt                       3907
_reflns_threshold_expression            >2sigma(I)
 
#----------------------------------------------------------------------------#
#                   COMPUTER PROGRAMS USED                                   #
#----------------------------------------------------------------------------#
 
_computing_data_collection              'CrysAlis CCD, Oxford Diffraction Ltd.'
_computing_cell_refinement              'CrysAlis RED, Oxford Diffraction Ltd.'
_computing_data_reduction               'CrysAlis RED, Oxford Diffraction Ltd.'
_computing_structure_solution           'SIR92 (Giacovazzo et al, 1993)'
_computing_structure_refinement         'SHELXL-97 (Sheldrick, 2008)'
_computing_molecular_graphics           'Ortep-3 for Windows (Farrugia, 1997)'
_computing_publication_material
                                   'WinGX publication routines (Farrugia, 1999)'
 
#----------------------------------------------------------------------------#
#                   STRUCTURE SOLUTION
#----------------------------------------------------------------------------#
 
_atom_sites_solution_primary            direct
_atom_sites_solution_secondary          difmap
_atom_sites_solution_hydrogens          geom
 
#----------------------------------------------------------------------------#
#                   REFINEMENT INFORMATION                                   #
#----------------------------------------------------------------------------#
 
_refine_special_details
;
 Refinement of F^2^ against ALL reflections.  The weighted R-factor wR and
 goodness of fit S are based on F^2^, conventional R-factors R are based
 on F, with F set to zero for negative F^2^. The threshold expression of
 F^2^ > 2sigma(F^2^) is used only for calculating R-factors(gt) etc. and is
 not relevant to the choice of reflections for refinement.  R-factors based
 on F^2^ are statistically about twice as large as those based on F, and R-
 factors based on ALL data will be even larger.
;
_refine_ls_structure_factor_coef        Fsqd
_refine_ls_matrix_type                  full
_refine_ls_weighting_scheme             calc
_refine_ls_weighting_details
         'calc w=1/[\s^2^(Fo^2^)+(0.0883P)^2^+1.2854P] where P=(Fo^2^+2Fc^2^)/3'
_refine_ls_hydrogen_treatment           constr
_refine_ls_extinction_method            SHELXL
_refine_ls_extinction_expression
                                    Fc^*^=kFc[1+0.001xFc^2^\l^3^/sin(2\q)]^-1/4^
_refine_ls_extinction_coef              0.0028(5)
_refine_ls_number_reflns                4302
_refine_ls_number_parameters            159
_refine_ls_number_restraints            0
_refine_ls_R_factor_all                 0.0468
_refine_ls_R_factor_gt                  0.0443
_refine_ls_wR_factor_ref                0.1252
_refine_ls_wR_factor_gt                 0.1231
_refine_ls_goodness_of_fit_ref          1.062
_refine_ls_restrained_S_all             1.062
_refine_ls_shift/su_max                 0.004
_refine_ls_shift/su_mean                0
_refine_diff_density_max                2.399
_refine_diff_density_min                -4.055
_refine_diff_density_rms                0.22
 
#----------------------------------------------------------------------------#
#                   ATOMIC TYPES, COORDINATES AND THERMAL PARAMETERS         #
#----------------------------------------------------------------------------#
 
loop_
    _atom_type_symbol
    _atom_type_description
    _atom_type_scat_dispersion_real
    _atom_type_scat_dispersion_imag
    _atom_type_scat_source
C C 0.0033 0.0016 'International Tables Vol C Tables 4.2.6.8 and 6.1.1.4'
H H 0 0 'International Tables Vol C Tables 4.2.6.8 and 6.1.1.4'
P P 0.1023 0.0942 'International Tables Vol C Tables 4.2.6.8 and 6.1.1.4'
Cl Cl 0.1484 0.1585 'International Tables Vol C Tables 4.2.6.8 and 6.1.1.4'
Au Au -2.0133 8.8022 'International Tables Vol C Tables 4.2.6.8 and 6.1.1.4'
 
loop_
    _atom_site_label
    _atom_site_type_symbol
    _atom_site_fract_x
    _atom_site_fract_y
    _atom_site_fract_z
    _atom_site_U_iso_or_equiv
    _atom_site_adp_type
    _atom_site_occupancy
    _atom_site_symmetry_multiplicity
    _atom_site_calc_flag
    _atom_site_refinement_flags
    _atom_site_disorder_assembly
    _atom_site_disorder_group
C1 C 0.3515(6) 0.3264(4) 0.3521(4) 0.0397(9) Uani 1 1 d . . .
C2 C 0.3645(5) 0.4349(4) 0.3585(4) 0.0405(9) Uani 1 1 d . . .
C3 C 0.2989(6) 0.4832(4) 0.4494(4) 0.0405(9) Uani 1 1 d . . .
C4 C 0.2362(5) 0.4113(4) 0.5135(4) 0.0388(9) Uani 1 1 d . . .
C5 C 0.3975(7) 0.2534(5) 0.2673(4) 0.0526(12) Uani 1 1 d . . .
H5A H 0.3296 0.2671 0.2103 0.079 Uiso 1 1 calc R . .
H5B H 0.3879 0.1774 0.2878 0.079 Uiso 1 1 calc R . .
H5C H 0.5049 0.2685 0.2487 0.079 Uiso 1 1 calc R . .
C6 C 0.4359(8) 0.5037(5) 0.2795(5) 0.0564(14) Uani 1 1 d . . .
H6A H 0.494 0.4574 0.2336 0.085 Uiso 1 1 calc R . .
H6B H 0.5062 0.5565 0.3101 0.085 Uiso 1 1 calc R . .
H6C H 0.3545 0.5422 0.2429 0.085 Uiso 1 1 calc R . .
C7 C 0.3013(7) 0.6026(4) 0.4651(5) 0.0512(12) Uani 1 1 d . . .
H7A H 0.2475 0.6202 0.527 0.077 Uiso 1 1 calc R . .
H7B H 0.2493 0.6387 0.4094 0.077 Uiso 1 1 calc R . .
H7C H 0.4086 0.6278 0.4693 0.077 Uiso 1 1 calc R . .
C8 C 0.1533(7) 0.4324(5) 0.6087(4) 0.0521(12) Uani 1 1 d . . .
H8A H 0.1945 0.4984 0.6396 0.078 Uiso 1 1 calc R . .
H8B H 0.1684 0.3707 0.6537 0.078 Uiso 1 1 calc R . .
H8C H 0.0427 0.4417 0.5953 0.078 Uiso 1 1 calc R . .
C9 C 0.0737(6) 0.2278(4) 0.4314(4) 0.0390(9) Uani 1 1 d . . .
C10 C -0.0042(6) 0.2688(5) 0.3492(4) 0.0454(10) Uani 1 1 d . . .
H10 H 0.0443 0.3217 0.3085 0.054 Uiso 1 1 calc R . .
C11 C -0.1506(7) 0.2335(5) 0.3263(5) 0.0519(12) Uani 1 1 d . . .
H11 H -0.2021 0.2616 0.2694 0.062 Uiso 1 1 calc R . .
C12 C -0.2251(7) 0.1557(5) 0.3868(6) 0.0533(15) Uani 1 1 d . . .
H12 H -0.3267 0.1313 0.3715 0.064 Uiso 1 1 calc R . .
C13 C -0.1468(7) 0.1160(5) 0.4685(5) 0.0547(13) Uani 1 1 d . . .
H13 H -0.1957 0.0639 0.5101 0.066 Uiso 1 1 calc R . .
C14 C 0.0019(7) 0.1505(4) 0.4913(5) 0.0463(11) Uani 1 1 d . . .
H14 H 0.0545 0.1216 0.5474 0.056 Uiso 1 1 calc R . .
P1 P 0.26370(14) 0.27744(10) 0.46339(9) 0.0368(2) Uani 1 1 d . . .
Cl1 Cl 0.54510(16) 0.04270(11) 0.64684(10) 0.0491(3) Uani 1 1 d . . .
Au1 Au 0.40252(2) 0.161531(14) 0.553700(14) 0.03979(11) Uani 1 1 d . . .
 
loop_
    _atom_site_aniso_label
    _atom_site_aniso_U_11
    _atom_site_aniso_U_22
    _atom_site_aniso_U_33
    _atom_site_aniso_U_23
    _atom_site_aniso_U_13
    _atom_site_aniso_U_12
C1 0.034(2) 0.046(2) 0.039(2) 0.0018(16) -0.0005(17) 0.0006(17)
C2 0.0322(19) 0.046(2) 0.043(2) 0.0055(18) 0.0001(16) -0.0036(17)
C3 0.036(2) 0.040(2) 0.046(2) 0.0022(17) -0.0066(17) 0.0007(17)
C4 0.036(2) 0.041(2) 0.039(2) 0.0014(17) -0.0034(16) -0.0021(17)
C5 0.051(3) 0.059(3) 0.048(3) -0.005(2) 0.005(2) 0.004(2)
C6 0.057(3) 0.059(3) 0.053(3) 0.015(2) 0.006(2) -0.014(3)
C7 0.054(3) 0.037(2) 0.063(3) 0.000(2) -0.005(2) 0.000(2)
C8 0.055(3) 0.055(3) 0.046(3) -0.002(2) 0.002(2) 0.003(2)
C9 0.036(2) 0.039(2) 0.042(2) -0.0019(17) -0.0008(16) 0.0005(17)
C10 0.041(2) 0.048(2) 0.047(2) 0.0005(19) -0.0030(19) -0.005(2)
C11 0.040(2) 0.057(3) 0.058(3) -0.001(2) -0.006(2) -0.005(2)
C12 0.030(2) 0.062(4) 0.068(4) -0.013(2) 0.002(2) -0.005(2)
C13 0.045(3) 0.048(3) 0.071(4) 0.004(2) 0.008(3) -0.009(2)
C14 0.044(3) 0.044(3) 0.052(3) 0.0069(19) 0.006(2) -0.0025(19)
P1 0.0356(5) 0.0368(5) 0.0379(5) 0.0024(4) -0.0004(4) -0.0019(4)
Cl1 0.0501(6) 0.0486(6) 0.0488(6) 0.0053(5) -0.0087(5) 0.0038(5)
Au1 0.03893(14) 0.03925(15) 0.04117(15) 0.00295(5) -0.00257(8) -0.00060(6)
 
 
#----------------------------------------------------------------------------#
#                   MOLECULAR GEOMETRY                                       #
#----------------------------------------------------------------------------#
 
_geom_special_details
;
 All esds (except the esd in the dihedral angle between two l.s. planes)
 are estimated using the full covariance matrix.  The cell esds are taken
 into account individually in the estimation of esds in distances, angles
 and torsion angles; correlations between esds in cell parameters are only
 used when they are defined by crystal symmetry.  An approximate (isotropic)
 treatment of cell esds is used for estimating esds involving l.s. planes.
;
loop_
    _geom_bond_atom_site_label_1
    _geom_bond_atom_site_label_2
    _geom_bond_distance
    _geom_bond_site_symmetry_2
    _geom_bond_publ_flag
C1 C2 1.343(7) . ?
C1 C5 1.507(8) . ?
C1 P1 1.787(5) . ?
C2 C3 1.477(7) . ?
C2 C6 1.495(7) . ?
C3 C4 1.350(7) . ?
C3 C7 1.485(7) . ?
C4 C8 1.493(7) . ?
C4 P1 1.797(5) . ?
C5 H5A 0.98 . ?
C5 H5B 0.98 . ?
C5 H5C 0.98 . ?
C6 H6A 0.98 . ?
C6 H6B 0.98 . ?
C6 H6C 0.98 . ?
C7 H7A 0.98 . ?
C7 H7B 0.98 . ?
C7 H7C 0.98 . ?
C8 H8A 0.98 . ?
C8 H8B 0.98 . ?
C8 H8C 0.98 . ?
C9 C10 1.389(7) . ?
C9 C14 1.394(7) . ?
C9 P1 1.804(5) . ?
C10 C11 1.372(7) . ?
C10 H10 0.95 . ?
C11 C12 1.414(9) . ?
C11 H11 0.95 . ?
C12 C13 1.380(10) . ?
C12 H12 0.95 . ?
C13 C14 1.388(8) . ?
C13 H13 0.95 . ?
C14 H14 0.95 . ?
P1 Au1 2.2241(12) . ?
Cl1 Au1 2.2854(13) . ?
 
loop_
    _geom_angle_atom_site_label_1
    _geom_angle_atom_site_label_2
    _geom_angle_atom_site_label_3
    _geom_angle
    _geom_angle_site_symmetry_1
    _geom_angle_site_symmetry_3
    _geom_angle_publ_flag
C2 C1 C5 128.2(5) . . ?
C2 C1 P1 108.5(4) . . ?
C5 C1 P1 123.2(4) . . ?
C1 C2 C3 114.9(4) . . ?
C1 C2 C6 123.5(5) . . ?
C3 C2 C6 121.6(5) . . ?
C4 C3 C2 115.0(4) . . ?
C4 C3 C7 124.2(5) . . ?
C2 C3 C7 120.8(5) . . ?
C3 C4 C8 129.0(5) . . ?
C3 C4 P1 107.9(4) . . ?
C8 C4 P1 123.1(4) . . ?
C1 C5 H5A 109.5 . . ?
C1 C5 H5B 109.5 . . ?
H5A C5 H5B 109.5 . . ?
C1 C5 H5C 109.5 . . ?
H5A C5 H5C 109.5 . . ?
H5B C5 H5C 109.5 . . ?
C2 C6 H6A 109.5 . . ?
C2 C6 H6B 109.5 . . ?
H6A C6 H6B 109.5 . . ?
C2 C6 H6C 109.5 . . ?
H6A C6 H6C 109.5 . . ?
H6B C6 H6C 109.5 . . ?
C3 C7 H7A 109.5 . . ?
C3 C7 H7B 109.5 . . ?
H7A C7 H7B 109.5 . . ?
C3 C7 H7C 109.5 . . ?
H7A C7 H7C 109.5 . . ?
H7B C7 H7C 109.5 . . ?
C4 C8 H8A 109.5 . . ?
C4 C8 H8B 109.5 . . ?
H8A C8 H8B 109.5 . . ?
C4 C8 H8C 109.5 . . ?
H8A C8 H8C 109.5 . . ?
H8B C8 H8C 109.5 . . ?
C10 C9 C14 119.6(5) . . ?
C10 C9 P1 120.4(4) . . ?
C14 C9 P1 120.0(4) . . ?
C11 C10 C9 120.6(5) . . ?
C11 C10 H10 119.7 . . ?
C9 C10 H10 119.7 . . ?
C10 C11 C12 120.4(6) . . ?
C10 C11 H11 119.8 . . ?
C12 C11 H11 119.8 . . ?
C13 C12 C11 118.4(5) . . ?
C13 C12 H12 120.8 . . ?
C11 C12 H12 120.8 . . ?
C12 C13 C14 121.3(5) . . ?
C12 C13 H13 119.3 . . ?
C14 C13 H13 119.3 . . ?
C13 C14 C9 119.7(6) . . ?
C13 C14 H14 120.2 . . ?
C9 C14 H14 120.2 . . ?
C1 P1 C4 93.6(2) . . ?
C1 P1 C9 107.7(2) . . ?
C4 P1 C9 106.2(2) . . ?
C1 P1 Au1 116.41(18) . . ?
C4 P1 Au1 117.06(16) . . ?
C9 P1 Au1 113.75(17) . . ?
P1 Au1 Cl1 179.86(5) . . ?
 
loop_
    _geom_hbond_atom_site_label_D
    _geom_hbond_atom_site_label_H
    _geom_hbond_atom_site_label_A
    _geom_hbond_distance_DH
    _geom_hbond_distance_HA
    _geom_hbond_distance_DA
    _geom_hbond_angle_DHA
    _geom_hbond_site_symmetry_A
C10 H10 Cl1 0.95 2.74 3.606(6) 151.3 4_565
 
#===END

data_[Au(TMP)(CH3CN)]SbF6

#----------------------------------------------------------------------------#
#                   CHEMICAL INFORMATION                                     #
#----------------------------------------------------------------------------#
 
_chemical_name_systematic
;
 ?
;
_chemical_formula_moiety                'C16 H20 Au N P, F6 Sb'
_chemical_formula_sum                   'C16 H20 Au F6 N P Sb'
_chemical_formula_weight                690.03
_chemical_compound_source               'synthesis as described'
 
#----------------------------------------------------------------------------#
#                   UNIT CELL INFORMATION                                    #
#----------------------------------------------------------------------------#
 
_symmetry_cell_setting                  monoclinic
_symmetry_space_group_name_H-M          'P 21/n '
_symmetry_space_group_name_Hall         '-P 2yn'
_symmetry_Int_Tables_number             14
loop_
    _symmetry_equiv_pos_as_xyz
'x, y, z'
'-x+1/2, y+1/2, -z+1/2'
'-x, -y, -z'
'x-1/2, -y-1/2, z-1/2'
 
_cell_length_a                          11.2945(5)
_cell_length_b                          12.3781(6)
_cell_length_c                          16.0285(7)
_cell_angle_alpha                       90
_cell_angle_beta                        110.382(2)
_cell_angle_gamma                       90
_cell_volume                            2100.56(17)
_cell_formula_units_Z                   4
_cell_measurement_temperature           180(2)
_cell_measurement_reflns_used           9697
_cell_measurement_theta_min             2.53
_cell_measurement_theta_max             30.5
_cell_measurement_wavelength            0.71073
 
#----------------------------------------------------------------------------#
#                   CRYSTAL INFORMATION                                      #
#----------------------------------------------------------------------------#
 
_exptl_crystal_description              plate
_exptl_crystal_colour                   colourless
_exptl_crystal_size_max                 0.24
_exptl_crystal_size_mid                 0.16
_exptl_crystal_size_min                 0.08
_exptl_crystal_density_diffrn           2.182
_exptl_crystal_density_method           'not measured'
_exptl_crystal_F_000                    1288
_exptl_special_details
;
 ?
;
 
#----------------------------------------------------------------------------#
#                   ABSORPTION CORRECTION                                    #
#----------------------------------------------------------------------------#
 
_exptl_absorpt_coefficient_mu           8.389
_exptl_absorpt_correction_type          multi-scan
_exptl_absorpt_process_details
;
        [c.f. r.h. blessing, acta cryst. (1995), a51, 33-38]
;
_exptl_absorpt_correction_T_min         0.2380
_exptl_absorpt_correction_T_max         0.5534
 
#----------------------------------------------------------------------------#
#                   DATA COLLECTION                                          #
#----------------------------------------------------------------------------#
 
_diffrn_ambient_temperature             180(2)
_diffrn_radiation_wavelength            0.71073
_diffrn_radiation_type                  MoK\a
_diffrn_radiation_source          'fine-focus sealed tube'
_diffrn_radiation_monochromator   graphite
_diffrn_measurement_device_type   'Bruker Kappa APEX II'
_diffrn_measurement_method        \w-\f
_diffrn_standards_number          0
_diffrn_standards_interval_count  0
_diffrn_standards_interval_time   0
_diffrn_standards_decay_%         0
_diffrn_radiation_probe                 x-ray
_diffrn_reflns_av_R_equivalents         0.0329
_diffrn_reflns_av_unetI/netI            0.0158
_diffrn_reflns_number                   78290
_diffrn_reflns_limit_h_min              -16
_diffrn_reflns_limit_h_max              16
_diffrn_reflns_limit_k_min              -15
_diffrn_reflns_limit_k_max              17
_diffrn_reflns_limit_l_min              -21
_diffrn_reflns_limit_l_max              22
_diffrn_reflns_theta_min                1.93
_diffrn_reflns_theta_max                30.56
_diffrn_reflns_theta_full               30.56
_diffrn_measured_fraction_theta_full
                                        0.999
_diffrn_measured_fraction_theta_max
                                        0.999
_reflns_number_total                    6414
_reflns_number_gt                       5716
_reflns_threshold_expression            >2sigma(I)
 
#----------------------------------------------------------------------------#
#                   COMPUTER PROGRAMS USED                                   #
#----------------------------------------------------------------------------#
 
_computing_data_collection              'Bruker SMART'
_computing_cell_refinement              'Bruker SMART'
_computing_data_reduction               'Bruker SAINT' 
_computing_structure_solution           'SHELXS-97 (Sheldrick, 1990)'
_computing_structure_refinement         'SHELXL-97 (Sheldrick, 2008)'
_computing_molecular_graphics           'Ortep-3 for Windows (Farrugia, 1997)'
_computing_publication_material
                                   'WinGX publication routines (Farrugia, 1999)'
 
#----------------------------------------------------------------------------#
#                   STRUCTURE SOLUTION
#----------------------------------------------------------------------------#
 
_atom_sites_solution_primary            direct
_atom_sites_solution_secondary          difmap
_atom_sites_solution_hydrogens          geom
 
#----------------------------------------------------------------------------#
#                   REFINEMENT INFORMATION                                   #
#----------------------------------------------------------------------------#
 
_refine_special_details
;
 Refinement of F^2^ against ALL reflections.  The weighted R-factor wR and
 goodness of fit S are based on F^2^, conventional R-factors R are based
 on F, with F set to zero for negative F^2^. The threshold expression of
 F^2^ > 2sigma(F^2^) is used only for calculating R-factors(gt) etc. and is
 not relevant to the choice of reflections for refinement.  R-factors based
 on F^2^ are statistically about twice as large as those based on F, and R-
 factors based on ALL data will be even larger.
;
_refine_ls_structure_factor_coef        Fsqd
_refine_ls_matrix_type                  full
_refine_ls_weighting_scheme             calc
_refine_ls_weighting_details
         'calc w=1/[\s^2^(Fo^2^)+(0.0242P)^2^+1.5973P] where P=(Fo^2^+2Fc^2^)/3'
_refine_ls_hydrogen_treatment           constr
_refine_ls_extinction_method            none
_refine_ls_number_reflns                6414
_refine_ls_number_parameters            240
_refine_ls_number_restraints            0
_refine_ls_R_factor_all                 0.0249
_refine_ls_R_factor_gt                  0.0196
_refine_ls_wR_factor_ref                0.0499
_refine_ls_wR_factor_gt                 0.0475
_refine_ls_goodness_of_fit_ref          1.047
_refine_ls_restrained_S_all             1.047
_refine_ls_shift/su_max                 0.004
_refine_ls_shift/su_mean                0
_refine_diff_density_max                0.845
_refine_diff_density_min                -0.922
_refine_diff_density_rms                0.095
 
#----------------------------------------------------------------------------#
#                   ATOMIC TYPES, COORDINATES AND THERMAL PARAMETERS         #
#----------------------------------------------------------------------------#
 
loop_
    _atom_type_symbol
    _atom_type_description
    _atom_type_scat_dispersion_real
    _atom_type_scat_dispersion_imag
    _atom_type_scat_source
C C 0.0033 0.0016 'International Tables Vol C Tables 4.2.6.8 and 6.1.1.4'
H H 0 0 'International Tables Vol C Tables 4.2.6.8 and 6.1.1.4'
N N 0.0061 0.0033 'International Tables Vol C Tables 4.2.6.8 and 6.1.1.4'
F F 0.0171 0.0103 'International Tables Vol C Tables 4.2.6.8 and 6.1.1.4'
P P 0.1023 0.0942 'International Tables Vol C Tables 4.2.6.8 and 6.1.1.4'
Sb Sb -0.5866 1.5461 'International Tables Vol C Tables 4.2.6.8 and 6.1.1.4'
Au Au -2.0133 8.8022 'International Tables Vol C Tables 4.2.6.8 and 6.1.1.4'
 
loop_
    _atom_site_label
    _atom_site_type_symbol
    _atom_site_fract_x
    _atom_site_fract_y
    _atom_site_fract_z
    _atom_site_U_iso_or_equiv
    _atom_site_adp_type
    _atom_site_occupancy
    _atom_site_symmetry_multiplicity
    _atom_site_calc_flag
    _atom_site_refinement_flags
    _atom_site_disorder_assembly
    _atom_site_disorder_group
C1 C 0.0890(2) 0.57942(18) 0.23086(16) 0.0305(4) Uani 1 1 d . . .
C2 C 0.0743(2) 0.54701(18) 0.30666(16) 0.0301(4) Uani 1 1 d . . .
C3 C 0.1488(2) 0.60999(18) 0.38749(15) 0.0294(4) Uani 1 1 d . . .
C4 C 0.2196(2) 0.68993(19) 0.37266(16) 0.0312(5) Uani 1 1 d . . .
C5 C 0.0322(3) 0.5352(2) 0.13754(18) 0.0448(6) Uani 1 1 d . . .
H5A H -0.019 0.4715 0.138 0.067 Uiso 1 1 calc R . .
H5B H 0.1 0.5149 0.1156 0.067 Uiso 1 1 calc R . .
H5C H -0.0211 0.5905 0.0985 0.067 Uiso 1 1 calc R . .
C6 C -0.0076(2) 0.4553(2) 0.3147(2) 0.0423(6) Uani 1 1 d . . .
H6A H -0.0441 0.4192 0.257 0.063 Uiso 1 1 calc R . .
H6B H -0.0757 0.4832 0.3334 0.063 Uiso 1 1 calc R . .
H6C H 0.0433 0.4036 0.359 0.063 Uiso 1 1 calc R . .
C7 C 0.1401(3) 0.5817(2) 0.47607(17) 0.0396(5) Uani 1 1 d . . .
H7A H 0.1963 0.6289 0.522 0.059 Uiso 1 1 calc R . .
H7B H 0.1654 0.5062 0.4903 0.059 Uiso 1 1 calc R . .
H7C H 0.053 0.5915 0.4739 0.059 Uiso 1 1 calc R . .
C8 C 0.3065(3) 0.7678(2) 0.43763(19) 0.0462(6) Uani 1 1 d . . .
H8A H 0.2667 0.8392 0.4302 0.069 Uiso 1 1 calc R . .
H8B H 0.3863 0.7727 0.4265 0.069 Uiso 1 1 calc R . .
H8C H 0.3229 0.7422 0.4985 0.069 Uiso 1 1 calc R . .
C9 C 0.1077(2) 0.81032(18) 0.20794(15) 0.0297(4) Uani 1 1 d . . .
C10 C 0.0014(2) 0.83744(19) 0.22878(17) 0.0345(5) Uani 1 1 d . . .
H10 H -0.0219 0.7945 0.2697 0.041 Uiso 1 1 calc R . .
C11 C -0.0700(2) 0.9266(2) 0.18994(18) 0.0395(5) Uani 1 1 d . . .
H11 H -0.1429 0.9445 0.2038 0.047 Uiso 1 1 calc R . .
C12 C -0.0357(3) 0.9900(2) 0.13089(18) 0.0403(6) Uani 1 1 d . . .
H12 H -0.0854 1.0509 0.104 0.048 Uiso 1 1 calc R . .
C13 C 0.0701(2) 0.9648(2) 0.11113(17) 0.0406(6) Uani 1 1 d . . .
H13 H 0.0941 1.0093 0.0714 0.049 Uiso 1 1 calc R . .
C14 C 0.1420(2) 0.8748(2) 0.14889(16) 0.0359(5) Uani 1 1 d . . .
H14 H 0.2145 0.8572 0.1345 0.043 Uiso 1 1 calc R . .
C15 C 0.6106(2) 0.6471(2) 0.16446(17) 0.0354(5) Uani 1 1 d . . .
C16 C 0.7213(3) 0.6376(3) 0.1395(2) 0.0478(7) Uani 1 1 d . . .
H16A H 0.7875 0.5987 0.1861 0.072 Uiso 1 1 calc R . .
H16B H 0.7518 0.7099 0.1322 0.072 Uiso 1 1 calc R . .
H16C H 0.6996 0.5979 0.0833 0.072 Uiso 1 1 calc R . .
N1 N 0.5239(2) 0.65372(19) 0.18362(15) 0.0396(5) Uani 1 1 d . . .
F1 F 0.2819(2) 0.6258(2) 0.82490(14) 0.0807(7) Uani 1 1 d . . .
F2 F 0.2802(2) 0.58975(15) 0.98634(15) 0.0657(5) Uani 1 1 d . . .
F3 F 0.3114(2) 0.79892(16) 1.02093(12) 0.0653(5) Uani 1 1 d . . .
F4 F 0.3118(2) 0.83436(18) 0.85953(14) 0.0751(7) Uani 1 1 d . . .
F5 F 0.12107(16) 0.73013(15) 0.88177(13) 0.0545(4) Uani 1 1 d . . .
F6 F 0.47158(17) 0.69399(19) 0.96404(15) 0.0682(6) Uani 1 1 d . . .
P1 P 0.19739(6) 0.69075(5) 0.25636(4) 0.02938(12) Uani 1 1 d . . .
Sb1 Sb 0.296369(15) 0.712086(14) 0.923348(10) 0.03453(4) Uani 1 1 d . . .
Au1 Au 0.368577(8) 0.670243(8) 0.219956(6) 0.03526(4) Uani 1 1 d . . .
 
loop_
    _atom_site_aniso_label
    _atom_site_aniso_U_11
    _atom_site_aniso_U_22
    _atom_site_aniso_U_33
    _atom_site_aniso_U_23
    _atom_site_aniso_U_13
    _atom_site_aniso_U_12
C1 0.0237(10) 0.0294(10) 0.0359(11) -0.0038(9) 0.0072(9) 0.0009(8)
C2 0.0214(9) 0.0254(10) 0.0415(12) 0.0026(9) 0.0082(9) 0.0022(8)
C3 0.0262(10) 0.0282(10) 0.0333(11) 0.0043(8) 0.0099(9) 0.0035(8)
C4 0.0283(11) 0.0341(11) 0.0322(11) -0.0012(9) 0.0118(9) -0.0021(9)
C5 0.0413(14) 0.0475(15) 0.0413(14) -0.0115(12) 0.0089(11) -0.0010(12)
C6 0.0350(13) 0.0324(12) 0.0528(15) 0.0068(11) 0.0070(11) -0.0057(10)
C7 0.0418(14) 0.0409(13) 0.0368(13) 0.0090(10) 0.0148(11) -0.0010(11)
C8 0.0492(16) 0.0505(16) 0.0386(14) -0.0080(12) 0.0150(12) -0.0194(13)
C9 0.0283(11) 0.0323(11) 0.0293(11) -0.0003(8) 0.0111(9) -0.0013(8)
C10 0.0362(13) 0.0343(12) 0.0379(13) 0.0001(9) 0.0191(10) 0.0001(9)
C11 0.0369(13) 0.0384(13) 0.0453(14) -0.0039(11) 0.0172(11) 0.0029(10)
C12 0.0405(13) 0.0325(12) 0.0402(13) 0.0004(10) 0.0045(11) 0.0000(10)
C13 0.0378(13) 0.0427(13) 0.0378(13) 0.0084(10) 0.0089(10) -0.0085(11)
C14 0.0288(11) 0.0443(13) 0.0360(12) 0.0025(10) 0.0133(9) -0.0052(10)
C15 0.0357(13) 0.0371(12) 0.0352(12) 0.0060(10) 0.0147(10) 0.0047(10)
C16 0.0398(15) 0.0554(16) 0.0579(17) 0.0027(14) 0.0290(13) 0.0031(13)
N1 0.0312(11) 0.0542(13) 0.0351(11) 0.0088(9) 0.0136(9) 0.0077(9)
F1 0.0634(13) 0.1195(19) 0.0644(13) -0.0558(13) 0.0287(10) -0.0192(13)
F2 0.0701(13) 0.0438(9) 0.0815(14) 0.0140(9) 0.0242(11) -0.0065(9)
F3 0.0932(16) 0.0584(11) 0.0443(10) -0.0241(8) 0.0239(10) -0.0164(11)
F4 0.0679(14) 0.0898(16) 0.0569(12) 0.0311(11) 0.0082(10) -0.0281(11)
F5 0.0355(8) 0.0626(11) 0.0636(11) -0.0005(9) 0.0148(8) 0.0000(8)
F6 0.0328(9) 0.0924(15) 0.0710(13) -0.0009(11) 0.0076(9) -0.0078(9)
P1 0.0254(3) 0.0342(3) 0.0304(3) 0.0000(2) 0.0122(2) -0.0011(2)
Sb1 0.03342(8) 0.03990(9) 0.02927(8) -0.00711(6) 0.00966(6) -0.00882(6)
Au1 0.02719(5) 0.04709(6) 0.03457(6) 0.00498(4) 0.01463(4) 0.00418(4)
 
 
#----------------------------------------------------------------------------#
#                   MOLECULAR GEOMETRY                                       #
#----------------------------------------------------------------------------#
 
_geom_special_details
;
 All esds (except the esd in the dihedral angle between two l.s. planes)
 are estimated using the full covariance matrix.  The cell esds are taken
 into account individually in the estimation of esds in distances, angles
 and torsion angles; correlations between esds in cell parameters are only
 used when they are defined by crystal symmetry.  An approximate (isotropic)
 treatment of cell esds is used for estimating esds involving l.s. planes.
;
loop_
    _geom_bond_atom_site_label_1
    _geom_bond_atom_site_label_2
    _geom_bond_distance
    _geom_bond_site_symmetry_2
    _geom_bond_publ_flag
C1 C2 1.344(3) . ?
C1 C5 1.510(3) . ?
C1 P1 1.793(2) . ?
C2 C3 1.495(3) . ?
C2 C6 1.498(3) . ?
C3 C4 1.344(3) . ?
C3 C7 1.498(3) . ?
C4 C8 1.505(3) . ?
C4 P1 1.792(2) . ?
C5 H5A 0.98 . ?
C5 H5B 0.98 . ?
C5 H5C 0.98 . ?
C6 H6A 0.98 . ?
C6 H6B 0.98 . ?
C6 H6C 0.98 . ?
C7 H7A 0.98 . ?
C7 H7B 0.98 . ?
C7 H7C 0.98 . ?
C8 H8A 0.98 . ?
C8 H8B 0.98 . ?
C8 H8C 0.98 . ?
C9 C14 1.392(3) . ?
C9 C10 1.395(3) . ?
C9 P1 1.809(2) . ?
C10 C11 1.381(4) . ?
C10 H10 0.95 . ?
C11 C12 1.384(4) . ?
C11 H11 0.95 . ?
C12 C13 1.374(4) . ?
C12 H12 0.95 . ?
C13 C14 1.387(4) . ?
C13 H13 0.95 . ?
C14 H14 0.95 . ?
C15 N1 1.127(3) . ?
C15 C16 1.443(4) . ?
C16 H16A 0.98 . ?
C16 H16B 0.98 . ?
C16 H16C 0.98 . ?
N1 Au1 2.042(2) . ?
F1 Sb1 1.8648(18) . ?
F2 Sb1 1.8641(18) . ?
F3 Sb1 1.8564(17) . ?
F4 Sb1 1.8686(18) . ?
F5 Sb1 1.8695(17) . ?
F6 Sb1 1.8688(19) . ?
P1 Au1 2.2201(6) . ?
 
loop_
    _geom_angle_atom_site_label_1
    _geom_angle_atom_site_label_2
    _geom_angle_atom_site_label_3
    _geom_angle
    _geom_angle_site_symmetry_1
    _geom_angle_site_symmetry_3
    _geom_angle_publ_flag
C2 C1 C5 130.1(2) . . ?
C2 C1 P1 108.24(17) . . ?
C5 C1 P1 121.69(19) . . ?
C1 C2 C3 114.7(2) . . ?
C1 C2 C6 125.4(2) . . ?
C3 C2 C6 119.9(2) . . ?
C4 C3 C2 114.9(2) . . ?
C4 C3 C7 125.4(2) . . ?
C2 C3 C7 119.8(2) . . ?
C3 C4 C8 129.3(2) . . ?
C3 C4 P1 108.17(18) . . ?
C8 C4 P1 122.49(18) . . ?
C1 C5 H5A 109.5 . . ?
C1 C5 H5B 109.5 . . ?
H5A C5 H5B 109.5 . . ?
C1 C5 H5C 109.5 . . ?
H5A C5 H5C 109.5 . . ?
H5B C5 H5C 109.5 . . ?
C2 C6 H6A 109.5 . . ?
C2 C6 H6B 109.5 . . ?
H6A C6 H6B 109.5 . . ?
C2 C6 H6C 109.5 . . ?
H6A C6 H6C 109.5 . . ?
H6B C6 H6C 109.5 . . ?
C3 C7 H7A 109.5 . . ?
C3 C7 H7B 109.5 . . ?
H7A C7 H7B 109.5 . . ?
C3 C7 H7C 109.5 . . ?
H7A C7 H7C 109.5 . . ?
H7B C7 H7C 109.5 . . ?
C4 C8 H8A 109.5 . . ?
C4 C8 H8B 109.5 . . ?
H8A C8 H8B 109.5 . . ?
C4 C8 H8C 109.5 . . ?
H8A C8 H8C 109.5 . . ?
H8B C8 H8C 109.5 . . ?
C14 C9 C10 119.5(2) . . ?
C14 C9 P1 120.91(18) . . ?
C10 C9 P1 119.63(18) . . ?
C11 C10 C9 120.1(2) . . ?
C11 C10 H10 120 . . ?
C9 C10 H10 120 . . ?
C10 C11 C12 120.2(2) . . ?
C10 C11 H11 119.9 . . ?
C12 C11 H11 119.9 . . ?
C13 C12 C11 120.1(2) . . ?
C13 C12 H12 119.9 . . ?
C11 C12 H12 119.9 . . ?
C12 C13 C14 120.4(2) . . ?
C12 C13 H13 119.8 . . ?
C14 C13 H13 119.8 . . ?
C13 C14 C9 119.8(2) . . ?
C13 C14 H14 120.1 . . ?
C9 C14 H14 120.1 . . ?
N1 C15 C16 179.4(3) . . ?
C15 C16 H16A 109.5 . . ?
C15 C16 H16B 109.5 . . ?
H16A C16 H16B 109.5 . . ?
C15 C16 H16C 109.5 . . ?
H16A C16 H16C 109.5 . . ?
H16B C16 H16C 109.5 . . ?
C15 N1 Au1 178.2(2) . . ?
C4 P1 C1 94.00(11) . . ?
C4 P1 C9 107.78(11) . . ?
C1 P1 C9 107.17(11) . . ?
C4 P1 Au1 116.98(8) . . ?
C1 P1 Au1 116.10(8) . . ?
C9 P1 Au1 112.94(8) . . ?
F3 Sb1 F2 90.65(10) . . ?
F3 Sb1 F1 179.51(11) . . ?
F2 Sb1 F1 89.83(11) . . ?
F3 Sb1 F4 89.64(10) . . ?
F2 Sb1 F4 179.62(10) . . ?
F1 Sb1 F4 89.89(12) . . ?
F3 Sb1 F6 90.04(10) . . ?
F2 Sb1 F6 90.31(10) . . ?
F1 Sb1 F6 89.82(10) . . ?
F4 Sb1 F6 89.93(10) . . ?
F3 Sb1 F5 90.32(10) . . ?
F2 Sb1 F5 89.92(9) . . ?
F1 Sb1 F5 89.82(9) . . ?
F4 Sb1 F5 89.84(10) . . ?
F6 Sb1 F5 179.58(9) . . ?
N1 Au1 P1 178.53(6) . . ?
 
loop_
    _geom_hbond_atom_site_label_D
    _geom_hbond_atom_site_label_H
    _geom_hbond_atom_site_label_A
    _geom_hbond_distance_DH
    _geom_hbond_distance_HA
    _geom_hbond_distance_DA
    _geom_hbond_angle_DHA
    _geom_hbond_site_symmetry_A
C6 H6C F3 0.98 2.42 3.396(3) 171.3 2_546
C11 H11 F1 0.95 2.53 3.228(3) 130.4 4_575
C14 H14 F3 0.95 2.53 3.388(3) 149.8 1_554

#===END

data_[Au(TPP)Cl]

#----------------------------------------------------------------------------#
#                   CHEMICAL INFORMATION                                     #
#----------------------------------------------------------------------------#
 
_chemical_name_systematic
;
 ?
;
_chemical_formula_moiety                'C22 H17 Au Cl P'
_chemical_formula_sum                   'C22 H17 Au Cl P'
_chemical_formula_weight                544.75
_chemical_compound_source               'synthesis as described'
 
#----------------------------------------------------------------------------#
#                   UNIT CELL INFORMATION                                    #
#----------------------------------------------------------------------------#
 
_symmetry_cell_setting                  orthorhombic
_symmetry_space_group_name_H-M          'P b c a'
_symmetry_space_group_name_Hall         '-P 2ac 2ab'
_symmetry_Int_Tables_number             61
loop_
    _symmetry_equiv_pos_as_xyz
'x, y, z'
'-x+1/2, -y, z+1/2'
'-x, y+1/2, -z+1/2'
'x+1/2, -y+1/2, -z'
'-x, -y, -z'
'x-1/2, y, -z-1/2'
'x, -y-1/2, z-1/2'
'-x-1/2, y-1/2, z'
 
_cell_length_a                          9.8877(4)
_cell_length_b                          17.1927(7)
_cell_length_c                          22.3641(10)
_cell_angle_alpha                       90
_cell_angle_beta                        90
_cell_angle_gamma                       90
_cell_volume                            3801.8(3)
_cell_formula_units_Z                   8
_cell_measurement_temperature           180(2)
_cell_measurement_reflns_used           9563
_cell_measurement_theta_min             2.37
_cell_measurement_theta_max             30.52
_cell_measurement_wavelength            0.71073
 
#----------------------------------------------------------------------------#
#                   CRYSTAL INFORMATION                                      #
#----------------------------------------------------------------------------#
 
_exptl_crystal_description              block
_exptl_crystal_colour                   yellow
_exptl_crystal_size_max                 0.2
_exptl_crystal_size_mid                 0.18
_exptl_crystal_size_min                 0.12
_exptl_crystal_density_diffrn           1.903
_exptl_crystal_density_method           'not measured'
_exptl_crystal_F_000                    2080
_exptl_special_details
;
 ?
;
 
#----------------------------------------------------------------------------#
#                   ABSORPTION CORRECTION                                    #
#----------------------------------------------------------------------------#
 
_exptl_absorpt_coefficient_mu           7.965
_exptl_absorpt_correction_type          multi-scan
_exptl_absorpt_process_details
;
        [c.f. r.h. blessing, acta cryst. (1995), a51, 33-38]
;
_exptl_absorpt_correction_T_min         0.2988
_exptl_absorpt_correction_T_max         0.4482
 
#----------------------------------------------------------------------------#
#                   DATA COLLECTION                                          #
#----------------------------------------------------------------------------#
 
_diffrn_ambient_temperature             180(2)
_diffrn_radiation_wavelength            0.71073
_diffrn_radiation_type                  MoK\a
_diffrn_radiation_source          'fine-focus sealed tube'
_diffrn_radiation_monochromator   graphite
_diffrn_measurement_device_type   'Bruker Kappa APEX II'
_diffrn_measurement_method        \w-\f
_diffrn_standards_number          0
_diffrn_standards_interval_count  0
_diffrn_standards_interval_time   0
_diffrn_standards_decay_%         0
_diffrn_radiation_probe                 x-ray
_diffrn_reflns_av_R_equivalents         0.0239
_diffrn_reflns_av_unetI/netI            0.0074
_diffrn_reflns_number                   77639
_diffrn_reflns_limit_h_min              -11
_diffrn_reflns_limit_h_max              11
_diffrn_reflns_limit_k_min              -20
_diffrn_reflns_limit_k_max              20
_diffrn_reflns_limit_l_min              -26
_diffrn_reflns_limit_l_max              26
_diffrn_reflns_theta_min                2.37
_diffrn_reflns_theta_max                25.35
_diffrn_reflns_theta_full               25.35
_diffrn_measured_fraction_theta_full
                                        0.931
_diffrn_measured_fraction_theta_max
                                        0.931
_reflns_number_total                    3235
_reflns_number_gt                       3060
_reflns_threshold_expression            >2sigma(I)
 
#----------------------------------------------------------------------------#
#                   COMPUTER PROGRAMS USED                                   #
#----------------------------------------------------------------------------#
 
_computing_data_collection              'Bruker SMART'
_computing_cell_refinement              'Bruker SMART'
_computing_data_reduction               'Bruker SAINT' 
_computing_structure_solution           'SHELXS-97 (Sheldrick, 1990)'
_computing_structure_refinement         'SHELXL-97 (Sheldrick, 1997)'
_computing_molecular_graphics           'Ortep-3 for Windows (Farrugia, 1997)'
_computing_publication_material
                                   'WinGX publication routines (Farrugia, 1999)'
 
#----------------------------------------------------------------------------#
#                   STRUCTURE SOLUTION
#----------------------------------------------------------------------------#
 
_atom_sites_solution_primary            direct
_atom_sites_solution_secondary          difmap
_atom_sites_solution_hydrogens          geom
 
#----------------------------------------------------------------------------#
#                   REFINEMENT INFORMATION                                   #
#----------------------------------------------------------------------------#
 
_refine_special_details
;
 Refinement of F^2^ against ALL reflections.  The weighted R-factor wR and
 goodness of fit S are based on F^2^, conventional R-factors R are based
 on F, with F set to zero for negative F^2^. The threshold expression of
 F^2^ > 2sigma(F^2^) is used only for calculating R-factors(gt) etc. and is
 not relevant to the choice of reflections for refinement.  R-factors based
 on F^2^ are statistically about twice as large as those based on F, and R-
 factors based on ALL data will be even larger.
;
_refine_ls_structure_factor_coef        Fsqd
_refine_ls_matrix_type                  full
_refine_ls_weighting_scheme             calc
_refine_ls_weighting_details
         'calc w=1/[\s^2^(Fo^2^)+(0.0158P)^2^+2.9992P] where P=(Fo^2^+2Fc^2^)/3'
_refine_ls_hydrogen_treatment           constr
_refine_ls_extinction_method            none
_refine_ls_number_reflns                3235
_refine_ls_number_parameters            226
_refine_ls_number_restraints            0
_refine_ls_R_factor_all                 0.0141
_refine_ls_R_factor_gt                  0.0126
_refine_ls_wR_factor_ref                0.034
_refine_ls_wR_factor_gt                 0.0329
_refine_ls_goodness_of_fit_ref          1.167
_refine_ls_restrained_S_all             1.167
_refine_ls_shift/su_max                 0.002
_refine_ls_shift/su_mean                0
_refine_diff_density_max                0.269
_refine_diff_density_min                -0.633
_refine_diff_density_rms                0.075
 
#----------------------------------------------------------------------------#
#                   ATOMIC TYPES, COORDINATES AND THERMAL PARAMETERS         #
#----------------------------------------------------------------------------#
 
loop_
    _atom_type_symbol
    _atom_type_description
    _atom_type_scat_dispersion_real
    _atom_type_scat_dispersion_imag
    _atom_type_scat_source
C C 0.0033 0.0016 'International Tables Vol C Tables 4.2.6.8 and 6.1.1.4'
H H 0 0 'International Tables Vol C Tables 4.2.6.8 and 6.1.1.4'
P P 0.1023 0.0942 'International Tables Vol C Tables 4.2.6.8 and 6.1.1.4'
Cl Cl 0.1484 0.1585 'International Tables Vol C Tables 4.2.6.8 and 6.1.1.4'
Au Au -2.0133 8.8022 'International Tables Vol C Tables 4.2.6.8 and 6.1.1.4'
 
loop_
    _atom_site_label
    _atom_site_type_symbol
    _atom_site_fract_x
    _atom_site_fract_y
    _atom_site_fract_z
    _atom_site_U_iso_or_equiv
    _atom_site_adp_type
    _atom_site_occupancy
    _atom_site_symmetry_multiplicity
    _atom_site_calc_flag
    _atom_site_refinement_flags
    _atom_site_disorder_assembly
    _atom_site_disorder_group
C1 C 0.6332(2) 0.28181(12) 0.58653(10) 0.0242(5) Uani 1 1 d . . .
C2 C 0.6169(3) 0.31535(13) 0.53232(11) 0.0310(5) Uani 1 1 d . . .
H2 H 0.5324 0.315 0.5121 0.037 Uiso 1 1 calc R . .
C3 C 0.7357(3) 0.35194(13) 0.50683(10) 0.0302(5) Uani 1 1 d . . .
H3 H 0.7336 0.3767 0.4689 0.036 Uiso 1 1 calc R . .
C4 C 0.8495(2) 0.34880(12) 0.54017(10) 0.0251(5) Uani 1 1 d . . .
C5 C 0.5318(3) 0.24325(13) 0.62407(10) 0.0251(5) Uani 1 1 d . . .
C6 C 0.5691(3) 0.19542(15) 0.67178(12) 0.0322(6) Uani 1 1 d . . .
H6 H 0.6622 0.1893 0.6812 0.039 Uiso 1 1 calc R . .
C7 C 0.4729(3) 0.15676(16) 0.70571(12) 0.0397(6) Uani 1 1 d . . .
H7 H 0.5002 0.124 0.7377 0.048 Uiso 1 1 calc R . .
C8 C 0.3376(3) 0.16597(16) 0.69277(13) 0.0431(7) Uani 1 1 d . . .
H8 H 0.2713 0.139 0.7155 0.052 Uiso 1 1 calc R . .
C9 C 0.2989(3) 0.21445(16) 0.64681(14) 0.0428(7) Uani 1 1 d . . .
H9 H 0.2055 0.2218 0.6386 0.051 Uiso 1 1 calc R . .
C10 C 0.3943(3) 0.25252(15) 0.61253(12) 0.0342(6) Uani 1 1 d . . .
H10 H 0.3659 0.2854 0.5808 0.041 Uiso 1 1 calc R . .
C11 C 0.9839(2) 0.38024(12) 0.52649(10) 0.0263(5) Uani 1 1 d . . .
C12 C 1.0828(2) 0.38696(14) 0.57073(12) 0.0331(6) Uani 1 1 d . . .
H12 H 1.0636 0.3695 0.6101 0.04 Uiso 1 1 calc R . .
C13 C 1.2082(3) 0.41860(14) 0.55822(13) 0.0383(6) Uani 1 1 d . . .
H13 H 1.2733 0.4241 0.5892 0.046 Uiso 1 1 calc R . .
C14 C 1.2389(3) 0.44221(13) 0.50094(13) 0.0395(6) Uani 1 1 d . . .
H14 H 1.3257 0.4628 0.4921 0.047 Uiso 1 1 calc R . .
C15 C 1.1429(3) 0.43572(13) 0.45663(12) 0.0385(7) Uani 1 1 d . . .
H15 H 1.1641 0.4519 0.4171 0.046 Uiso 1 1 calc R . .
C16 C 1.0157(3) 0.40574(12) 0.46908(11) 0.0308(5) Uani 1 1 d . . .
H16 H 0.9498 0.4026 0.4382 0.037 Uiso 1 1 calc R . .
C17 C 0.8105(2) 0.35867(12) 0.66982(9) 0.0235(5) Uani 1 1 d . . .
C18 C 0.8892(3) 0.34401(15) 0.72033(11) 0.0349(6) Uani 1 1 d . . .
H18 H 0.9444 0.2988 0.7223 0.042 Uiso 1 1 calc R . .
C19 C 0.8860(3) 0.39602(16) 0.76759(12) 0.0441(7) Uani 1 1 d . . .
H19 H 0.9396 0.3864 0.8021 0.053 Uiso 1 1 calc R . .
C20 C 0.8062(3) 0.46134(16) 0.76516(12) 0.0441(7) Uani 1 1 d . . .
H20 H 0.8047 0.4965 0.7979 0.053 Uiso 1 1 calc R . .
C21 C 0.7285(3) 0.47604(15) 0.71535(11) 0.0407(6) Uani 1 1 d . . .
H21 H 0.6733 0.5212 0.7138 0.049 Uiso 1 1 calc R . .
C22 C 0.7307(2) 0.42495(13) 0.66748(11) 0.0304(5) Uani 1 1 d . . .
H22 H 0.6776 0.4353 0.633 0.037 Uiso 1 1 calc R . .
P1 P 0.80919(6) 0.29316(3) 0.60672(2) 0.02143(12) Uani 1 1 d . . .
Cl1 Cl 1.02685(7) 0.06333(3) 0.61527(3) 0.03274(14) Uani 1 1 d . . .
Au1 Au 0.919495(9) 0.180788(5) 0.613692(4) 0.02278(4) Uani 1 1 d . . .
 
loop_
    _atom_site_aniso_label
    _atom_site_aniso_U_11
    _atom_site_aniso_U_22
    _atom_site_aniso_U_33
    _atom_site_aniso_U_23
    _atom_site_aniso_U_13
    _atom_site_aniso_U_12
C1 0.0217(13) 0.0223(10) 0.0284(12) -0.0041(9) -0.0037(10) 0.0010(9)
C2 0.0277(14) 0.0357(13) 0.0296(13) -0.0033(10) -0.0090(11) 0.0008(10)
C3 0.0388(15) 0.0290(12) 0.0227(11) 0.0025(9) -0.0031(10) 0.0022(10)
C4 0.0324(14) 0.0195(10) 0.0235(11) 0.0004(9) 0.0016(10) 0.0026(9)
C5 0.0226(14) 0.0229(11) 0.0297(12) -0.0078(9) 0.0008(10) -0.0027(10)
C6 0.0214(15) 0.0411(13) 0.0340(14) -0.0012(11) -0.0006(10) -0.0025(10)
C7 0.0374(17) 0.0410(14) 0.0407(15) 0.0029(12) 0.0088(12) -0.0042(12)
C8 0.0361(18) 0.0417(14) 0.0514(17) -0.0083(13) 0.0137(13) -0.0117(12)
C9 0.0214(15) 0.0433(15) 0.0637(19) -0.0149(14) 0.0022(13) -0.0041(12)
C10 0.0264(16) 0.0313(13) 0.0450(16) -0.0075(10) -0.0045(11) 0.0003(11)
C11 0.0303(14) 0.0174(10) 0.0313(12) -0.0002(9) 0.0064(10) 0.0035(9)
C12 0.0311(15) 0.0326(13) 0.0355(13) 0.0075(10) 0.0028(10) 0.0002(10)
C13 0.0290(15) 0.0346(13) 0.0514(17) 0.0037(12) 0.0011(12) -0.0011(11)
C14 0.0357(17) 0.0259(12) 0.0569(18) -0.0010(11) 0.0152(13) -0.0036(10)
C15 0.0540(19) 0.0239(12) 0.0376(15) -0.0004(10) 0.0217(13) -0.0025(11)
C16 0.0422(16) 0.0210(10) 0.0294(12) -0.0025(9) 0.0081(11) -0.0006(10)
C17 0.0228(13) 0.0240(10) 0.0238(11) 0.0023(9) -0.0002(9) -0.0043(9)
C18 0.0377(15) 0.0331(12) 0.0338(14) 0.0077(11) -0.0110(11) -0.0026(11)
C19 0.0593(19) 0.0448(15) 0.0283(14) 0.0033(11) -0.0208(13) -0.0093(14)
C20 0.063(2) 0.0394(14) 0.0293(14) -0.0087(11) -0.0092(13) -0.0076(14)
C21 0.0485(18) 0.0371(14) 0.0366(14) -0.0105(11) -0.0076(12) 0.0075(12)
C22 0.0326(14) 0.0330(12) 0.0256(12) -0.0033(10) -0.0070(10) 0.0034(10)
P1 0.0203(3) 0.0210(3) 0.0230(3) 0.0020(2) -0.0014(2) 0.0001(2)
Cl1 0.0282(4) 0.0270(3) 0.0430(3) 0.0083(2) 0.0013(2) 0.0066(2)
Au1 0.01889(7) 0.02198(6) 0.02747(6) 0.00465(3) 0.00063(3) 0.00107(3)
 
 
#----------------------------------------------------------------------------#
#                   MOLECULAR GEOMETRY                                       #
#----------------------------------------------------------------------------#
 
_geom_special_details
;
 All esds (except the esd in the dihedral angle between two l.s. planes)
 are estimated using the full covariance matrix.  The cell esds are taken
 into account individually in the estimation of esds in distances, angles
 and torsion angles; correlations between esds in cell parameters are only
 used when they are defined by crystal symmetry.  An approximate (isotropic)
 treatment of cell esds is used for estimating esds involving l.s. planes.
;
loop_
    _geom_bond_atom_site_label_1
    _geom_bond_atom_site_label_2
    _geom_bond_distance
    _geom_bond_site_symmetry_2
    _geom_bond_publ_flag
C1 C2 1.352(3) . ?
C1 C5 1.466(3) . ?
C1 P1 1.808(2) . ?
C2 C3 1.449(4) . ?
C2 H2 0.95 . ?
C3 C4 1.351(3) . ?
C3 H3 0.95 . ?
C4 C11 1.467(3) . ?
C4 P1 1.814(2) . ?
C5 C10 1.393(4) . ?
C5 C6 1.396(3) . ?
C6 C7 1.386(4) . ?
C6 H6 0.95 . ?
C7 C8 1.378(4) . ?
C7 H7 0.95 . ?
C8 C9 1.378(4) . ?
C8 H8 0.95 . ?
C9 C10 1.381(4) . ?
C9 H9 0.95 . ?
C10 H10 0.95 . ?
C11 C16 1.393(3) . ?
C11 C12 1.396(3) . ?
C12 C13 1.382(4) . ?
C12 H12 0.95 . ?
C13 C14 1.378(4) . ?
C13 H13 0.95 . ?
C14 C15 1.376(4) . ?
C14 H14 0.95 . ?
C15 C16 1.388(4) . ?
C15 H15 0.95 . ?
C16 H16 0.95 . ?
C17 C22 1.387(3) . ?
C17 C18 1.395(3) . ?
C17 P1 1.806(2) . ?
C18 C19 1.385(4) . ?
C18 H18 0.95 . ?
C19 C20 1.373(4) . ?
C19 H19 0.95 . ?
C20 C21 1.377(4) . ?
C20 H20 0.95 . ?
C21 C22 1.385(3) . ?
C21 H21 0.95 . ?
C22 H22 0.95 . ?
P1 Au1 2.2241(6) . ?
Cl1 Au1 2.2817(6) . ?
 
loop_
    _geom_angle_atom_site_label_1
    _geom_angle_atom_site_label_2
    _geom_angle_atom_site_label_3
    _geom_angle
    _geom_angle_site_symmetry_1
    _geom_angle_site_symmetry_3
    _geom_angle_publ_flag
C2 C1 C5 128.7(2) . . ?
C2 C1 P1 107.01(18) . . ?
C5 C1 P1 124.33(17) . . ?
C1 C2 C3 116.2(2) . . ?
C1 C2 H2 121.9 . . ?
C3 C2 H2 121.9 . . ?
C4 C3 C2 116.2(2) . . ?
C4 C3 H3 121.9 . . ?
C2 C3 H3 121.9 . . ?
C3 C4 C11 128.7(2) . . ?
C3 C4 P1 106.91(17) . . ?
C11 C4 P1 124.37(17) . . ?
C10 C5 C6 117.8(2) . . ?
C10 C5 C1 120.6(2) . . ?
C6 C5 C1 121.6(2) . . ?
C7 C6 C5 121.3(2) . . ?
C7 C6 H6 119.3 . . ?
C5 C6 H6 119.3 . . ?
C8 C7 C6 119.7(3) . . ?
C8 C7 H7 120.1 . . ?
C6 C7 H7 120.1 . . ?
C9 C8 C7 119.8(3) . . ?
C9 C8 H8 120.1 . . ?
C7 C8 H8 120.1 . . ?
C8 C9 C10 120.7(3) . . ?
C8 C9 H9 119.6 . . ?
C10 C9 H9 119.6 . . ?
C9 C10 C5 120.7(3) . . ?
C9 C10 H10 119.7 . . ?
C5 C10 H10 119.7 . . ?
C16 C11 C12 118.0(2) . . ?
C16 C11 C4 120.8(2) . . ?
C12 C11 C4 121.2(2) . . ?
C13 C12 C11 121.2(2) . . ?
C13 C12 H12 119.4 . . ?
C11 C12 H12 119.4 . . ?
C14 C13 C12 120.1(3) . . ?
C14 C13 H13 119.9 . . ?
C12 C13 H13 119.9 . . ?
C15 C14 C13 119.6(2) . . ?
C15 C14 H14 120.2 . . ?
C13 C14 H14 120.2 . . ?
C14 C15 C16 120.7(2) . . ?
C14 C15 H15 119.7 . . ?
C16 C15 H15 119.7 . . ?
C15 C16 C11 120.4(2) . . ?
C15 C16 H16 119.8 . . ?
C11 C16 H16 119.8 . . ?
C22 C17 C18 119.8(2) . . ?
C22 C17 P1 118.64(17) . . ?
C18 C17 P1 121.61(18) . . ?
C19 C18 C17 119.2(2) . . ?
C19 C18 H18 120.4 . . ?
C17 C18 H18 120.4 . . ?
C20 C19 C18 120.7(2) . . ?
C20 C19 H19 119.6 . . ?
C18 C19 H19 119.6 . . ?
C19 C20 C21 120.2(2) . . ?
C19 C20 H20 119.9 . . ?
C21 C20 H20 119.9 . . ?
C20 C21 C22 120.0(2) . . ?
C20 C21 H21 120 . . ?
C22 C21 H21 120 . . ?
C21 C22 C17 120.1(2) . . ?
C21 C22 H22 120 . . ?
C17 C22 H22 120 . . ?
C17 P1 C1 105.61(10) . . ?
C17 P1 C4 108.11(10) . . ?
C1 P1 C4 93.64(11) . . ?
C17 P1 Au1 118.92(7) . . ?
C1 P1 Au1 113.31(7) . . ?
C4 P1 Au1 114.08(8) . . ?
P1 Au1 Cl1 176.43(2) . . ?

#===END
